# Supplementary material for: Factors Influencing the Consumption of Seaweed amongst Young Adults
Source: MDPI journal article supplement (doi:10.3390/foods11193052), 2022-10-01
Supplement: s1 [file s1]

# Supplementary Materials

## Survey Questions

**Table S1:** Survey questions and responses.\*

| Survey Question                                                                                                                                   | Response Type/Options                                                                                                                                                                                                                                                                |
|---------------------------------------------------------------------------------------------------------------------------------------------------|--------------------------------------------------------------------------------------------------------------------------------------------------------------------------------------------------------------------------------------------------------------------------------------|
| 1. How old are you (in years)?                                                                                                                    | <ul style="list-style-type: none"> <li>• &lt; 19</li> <li>• 19-24</li> <li>• 25-30</li> <li>• &gt; 30</li> </ul>                                                                                                                                                                     |
| 2. Have you eaten seaweed on at least one occasion over the past 12 months? For example, sushi wrapped in seaweed, seaweed crackers or miso soup. | <ul style="list-style-type: none"> <li>• Yes</li> <li>• No</li> <li>• Unsure</li> </ul>                                                                                                                                                                                              |
| 3. Are you comfortable completing this survey in English?                                                                                         | <ul style="list-style-type: none"> <li>• Yes</li> <li>• No</li> </ul>                                                                                                                                                                                                                |
| 4. What is your gender?                                                                                                                           | <ul style="list-style-type: none"> <li>• Male</li> <li>• Female</li> <li>• Non-binary/Other</li> <li>• Prefer not to say</li> </ul>                                                                                                                                                  |
| 5. What is your highest level of education?                                                                                                       | <ul style="list-style-type: none"> <li>• Completed primary school</li> <li>• Completed high school or equivalent</li> <li>• Completed diploma, certificate or equivalent</li> <li>• Completed tertiary level education, equivalent, or above</li> <li>• Prefer not to say</li> </ul> |
| 6. What is your average household income? (in \$AUD)                                                                                              | <ul style="list-style-type: none"> <li>• Under \$40,000</li> <li>• \$40,000-\$59,999</li> <li>• \$60,000-\$99,999</li> <li>• \$100,000 or over</li> <li>• Prefer not to say</li> </ul>                                                                                               |
| 7. What is your postcode?                                                                                                                         | [Free text]                                                                                                                                                                                                                                                                          |
| 8. Please list three of the greatest <b>advantages</b> of eating seaweed (what are the 3 best things about eating seaweed).                       | [Free text]<br>[Free text]<br>[Free text]                                                                                                                                                                                                                                            |
| 9. Please list three of the greatest <b>disadvantages</b> of eating seaweed (what are the 3 worst things about eating seaweed).                   | [Free text]<br>[Free text]<br>[Free text]                                                                                                                                                                                                                                            |

---

10. Please list three factors that would **enable (make it easier)** for you to eat seaweed. [Free text]  
[Free text]  
[Free text]

11. Please list three factors that make it **difficult (harder)** for you to eat seaweed. [Free text]  
[Free text]  
[Free text]

12. How important are the following factors in influencing your decision to purchase seaweed? Please respond to all options.

|                          | Not applicable        | Not at all important  | Slightly important    | Moderately important  | Very important        | Extremely important   |
|--------------------------|-----------------------|-----------------------|-----------------------|-----------------------|-----------------------|-----------------------|
| Taste                    | <input type="radio"/> |
| Cost                     | <input type="radio"/> |
| Freshness                | <input type="radio"/> |
| Ease of preparation      | <input type="radio"/> |
| Friend/Family preference | <input type="radio"/> |
| Health                   | <input type="radio"/> |

13. Which sources of seaweed information would you use? Select all that apply.

- Books
- Brochures/Handouts
- Consumer advocacy groups
- Environmental groups
- Family/Friends
- General practitioners
- Government publications
- Health newsletter
- Internet
- Media
- Nutritionists/Dietitians
- Point of purchase

14. What would be the best way (your preferred way) for you to get information about seaweed? Select one.

- Books
- Brochure/Handouts
- Environmental groups
- Family/Friends
- General practitioners
- Health newsletter
- In-store signs
- Internet
- Media
- Nutritionists/Dietitians
- Point of purchase

---

|                                                                                                             |                                                                                                                                                                                                        |
|-------------------------------------------------------------------------------------------------------------|--------------------------------------------------------------------------------------------------------------------------------------------------------------------------------------------------------|
| 15. Can you recall any varieties or types of seaweed?                                                       | <ul style="list-style-type: none"> <li>• Yes (please specify): [Free text]</li> <li>• No</li> </ul>                                                                                                    |
| 16. [Display this question if answer to Q.15 is yes] What varieties or types of seaweed do you like to eat? | [Free text]                                                                                                                                                                                            |
| 17. When do you eat seaweed? Select all that apply.                                                         | <ul style="list-style-type: none"> <li>• Lunch</li> <li>• Dinner</li> <li>• Snacks</li> <li>• Special occasion (please specify): [Free text]</li> <li>• Other (please specify): [Free text]</li> </ul> |

[illegible][illegible]

|                                                    |                       |                       |                       |                       |                       |                       |                       |
|----------------------------------------------------|-----------------------|-----------------------|-----------------------|-----------------------|-----------------------|-----------------------|-----------------------|
| If I don't know what is in a food, I won't try it. | <input type="radio"/> |
| I like foods from different countries.             | <input type="radio"/> |
| Ethnic food looks too weird to eat.                | <input type="radio"/> |
| At dinner parties, I will try a new food.          | <input type="radio"/> |
| I am afraid to eat things I have never had before. | <input type="radio"/> |
| I am very particular about the foods I will eat.   | <input type="radio"/> |
| I will eat almost anything.                        | <input type="radio"/> |
| I like to try new ethnic restaurants.              | <input type="radio"/> |

\*The survey includes an adapted version of the tool used by Hicks et al to assess consumer beliefs and knowledge regarding seafood consumption (Q.13, Q.14, Q.18) [31], and the validated Food Neophobia Scale by Pliner and Hobden (Q.19) [25].
